# Supplementary material for: Loss to Follow-Up from HIV Pre-Exposure Prophylaxis Care in Men Who Have Sex with Men in West Africa
Source: MDPI journal article supplement (doi:10.3390/v14112380), 2022-10-28
Supplement: s1 [file s1]

## Supplemental Material 1

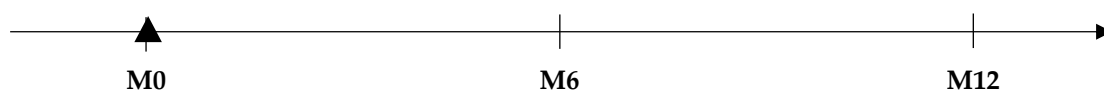

Participant 1 never returned for follow-up after their first visit. They are considered as LTFU.

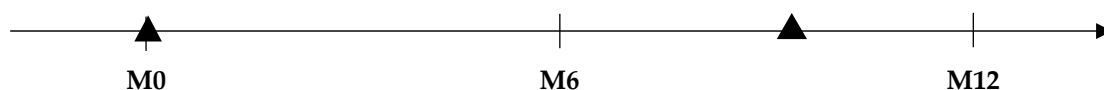

Participant 2 returned for follow-up more than 6 months after their last visit. They are considered as LTFU.

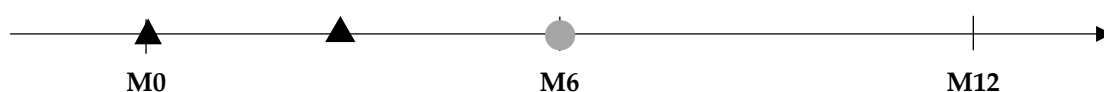

Participant 3 withdrew from care after their last visit. They are considered as LTFU.

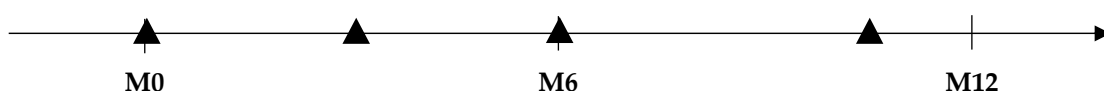

Participant 4 returned for follow-up less than 6 months after their last visit. They are not considered as LTFU.

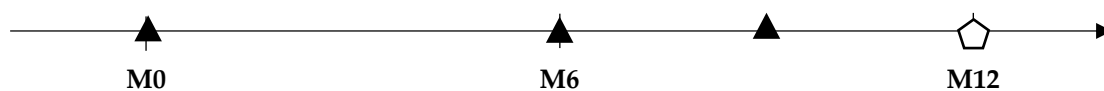

Participant 5 experienced an HIV seroconversion after their last visit. They are not considered as LTFU.

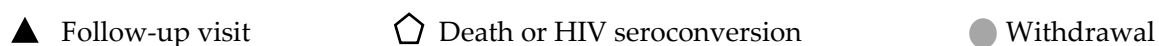

**Scheme S1.** Definition of LTFU
